- of positive end-expiratory pressure. *Br J Anaesth* 1998; 80:360–4
27. Gattinoni L, Pesenti A, Bombino M, Baglioni S, Rivolta M, Rossi F, Rossi G, Fumagalli R, Marcolin R, Mascheroni D: Relationships between lung computed tomographic density, gas exchange, and PEEP in acute respiratory failure. *ANESTHESIOLOGY* 1988; 69:824–32
  28. Gattinoni L, Pesenti A: The concept of “baby lung”. *Intensive Care Med* 2005; 31:776–84
  29. Peltekova V, Engelberts D, Otulakowski G, Uematsu S, Post M, Kavanagh BP: Hypercapnic acidosis in ventilator-induced lung injury. *Intensive Care Med* 2010; 36:869–78
  30. Mascheroni D, Kolobow T, Fumagalli R, Moretti MP, Chen V, Buckhold D: Acute respiratory failure following pharmacologically induced hyperventilation: An experimental animal study. *Intensive Care Med* 1988; 15:8–14
  31. Cressoni M, Caironi P, Polli F, Carlesso E, Chiumello D, Cadringer P, Quintel M, Ranieri VM, Bugeo G, Gattinoni L: Anatomical and functional intrapulmonary shunt in acute respiratory distress syndrome. *Crit Care Med* 2008; 36:669–75
  32. Gattinoni L, Bombino M, Pelosi P, Lissoni A, Pesenti A, Fumagalli R, Tagliabue M: Lung structure and function in different stages of severe adult respiratory distress syndrome. *JAMA* 1994; 271:1772–9

## ANESTHESIOLOGY REFLECTIONS FROM THE WOOD LIBRARY-MUSEUM

### Labat and the Anglo-French Drug Company’s Neocaine

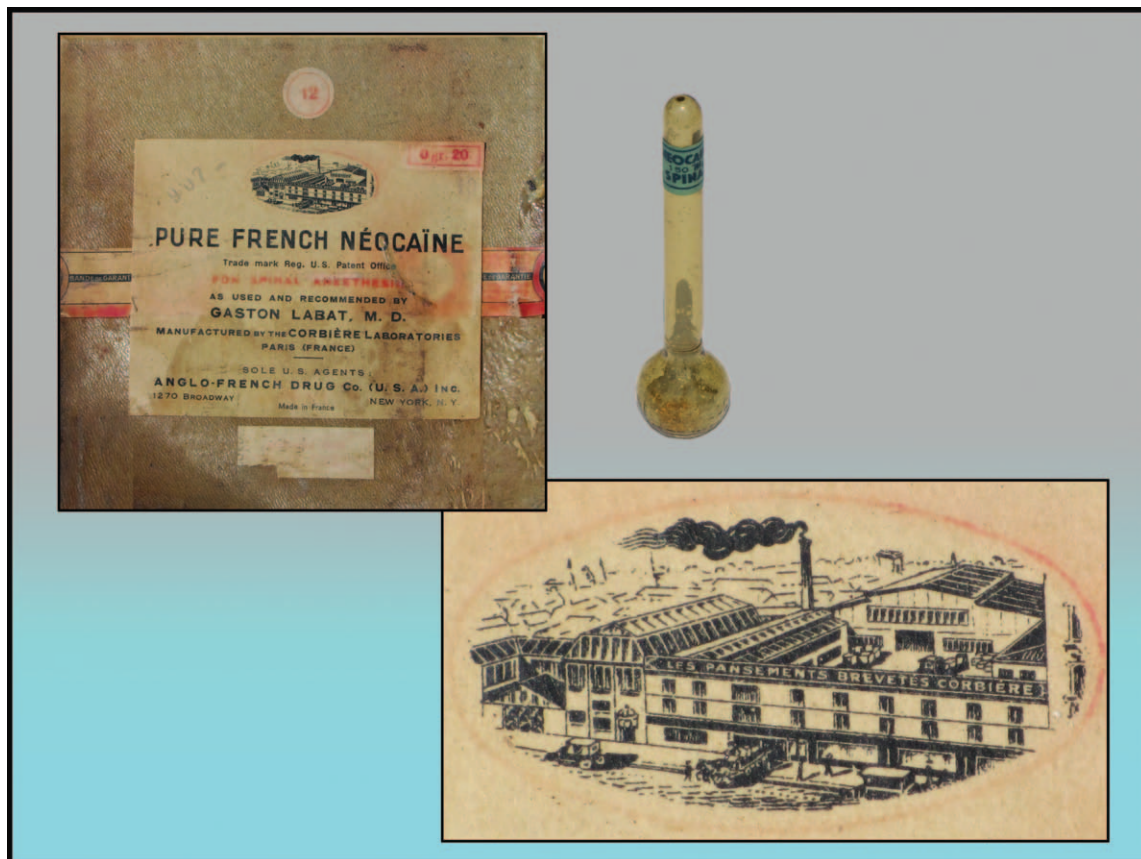

Manufactured in Paris, France, by the Corbière Laboratories (*lower right*), “PURE FRENCH NÉOCAÏNE” was a brand of the local anesthetic procaine distributed as crystals inside a glass ampoule (*high middle*) from New York City by the Anglo-French Drug Company (AFDC). Following World War I, America’s brief unhappiness with using German products (e.g., Novocaine) and the advocacy for Neocaine by French-trained Louis Gaston Labat, M.D. (1876–1934), combined to propel sales of Neocaine with Labat’s name on the box (*high left*). By 1930 the AFDC was distributing a 22-page publication, *The Safety of Spinal Anesthesia: Labat’s Technique with Neocaine*, which noted that it was “Written by a Registered Physician and Reviewed by an Authority on Spinal Anesthesia.” In a 1936 advertisement, the AFDC characterized Neocaine in the “field of spinal anesthesia” as “unequaled” and compared the product to British Guiana’s Kaieteur Falls, the world’s broadest single-drop waterfall. During World War II as America joined British and French allies, “Anglo-French” trumpeted that “Neocaine has accompanied our armies to all parts of the world.” (Copyright © the American Society of Anesthesiologists, Inc.)

George S. Bause, M.D., M.P.H., Honorary Curator, ASA’s Wood Library-Museum of Anesthesiology, Schaumburg, Illinois, and Clinical Associate Professor, Case Western Reserve University, Cleveland, Ohio. UJYC@aol.com.
